# Supplementary material for: Role of Autocleavage in the Function of a Type III Secretion Specificity Switch Protein in Salmonella enterica Serovar Typhimurium
Source: PubMed Central journal article supplement — mBio. 2015 Oct 13;6(5):e01459-15. doi: 10.1128/mBio.01459-15 (PMC4620466; doi:10.1128/mbio.01459-15), 2015-10-13
Supplement: mbo005152512sf1.pdf [file mbo005152512sf1.pdf]

1 **Figure S1 to Monjarás Feria J.V. et al. “Role of autocleavage in the function of a**  
2 **type III secretion specificity switch protein in *Salmonella* Typhimurium”**

3

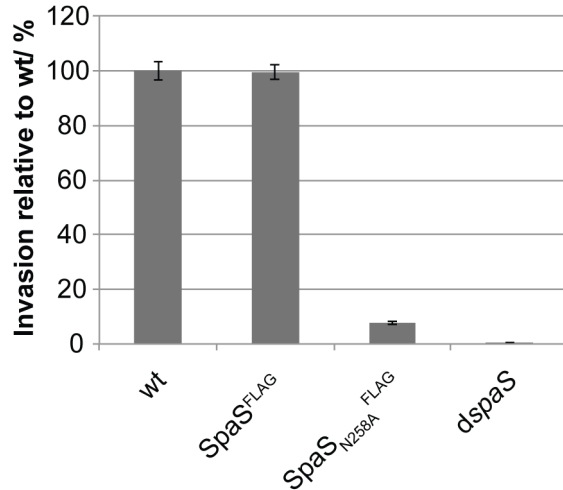

4

5 **Figure S1: Host cell invasion of the autocleavage-deficient SpaS<sub>N258A</sub> mutant.**

6 Host cell invasion of indicated *S. Typhimurium* strains was assessed by a Gentamicin  
7 protection assay as described previously (1). Shown are the results of independent  
8 triplicate samples. Error bars indicate the standard deviation (student's T-test).

9

10 **Reference**

- 11 1. **Collazo CM, Galan JE.** 1997. The invasion-associated type III system of  
12 *Salmonella typhimurium* directs the translocation of Sip proteins into the host  
13 cell. *Mol Microbiol* **24**:747–756.
