# Supplementary material for: Role of Autocleavage in the Function of a Type III Secretion Specificity Switch Protein in Salmonella enterica Serovar Typhimurium
Source: PubMed Central journal article supplement — mBio. 2015 Oct 13;6(5):e01459-15. doi: 10.1128/mBio.01459-15 (PMC4620466; doi:10.1128/mbio.01459-15), 2015-10-13
Supplement: mbo005152512sf2.pdf [file mbo005152512sf2.pdf]

1 **Figure S2 to Monjarás Feria J.V. et al. “Role of autocleavage in the function of a**  
2 **type III secretion specificity switch protein in *Salmonella* Typhimurium”**

3

SpaS<sub>N258A</sub>,  $\Delta invJ$

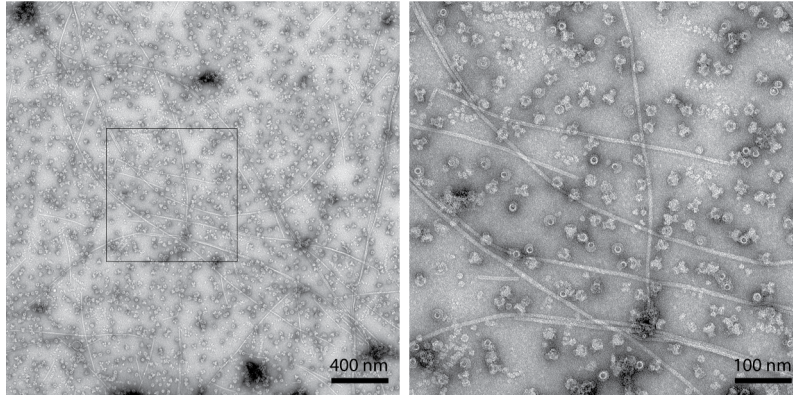

4

5 **Figure S2: Loss of needle length control in *invJ* deletion mutant is independent**  
6 **of autocleavage of SpaS.** Purified needle complexes of a SpaS<sub>N258A</sub><sup>FLAG</sup>,  $\Delta invJ$  *S.*  
7 *Typhimurium* strain were negatively stained on copper grids and visualized by  
8 electron microscopy. Right image shows magnification of left image at the indicated  
9 position.
