# Supplementary material for: Role of Autocleavage in the Function of a Type III Secretion Specificity Switch Protein in Salmonella enterica Serovar Typhimurium
Source: PubMed Central journal article supplement — mBio. 2015 Oct 13;6(5):e01459-15. doi: 10.1128/mBio.01459-15 (PMC4620466; doi:10.1128/mbio.01459-15), 2015-10-13
Supplement: mbo005152512sf3.pdf [file mbo005152512sf3.pdf]

1 **Figure S3 to Monjarás Feria J.V. et al. “Role of autocleavage in the function of a**  
2 **type III secretion specificity switch protein in *Salmonella Typhimurium*”**

3

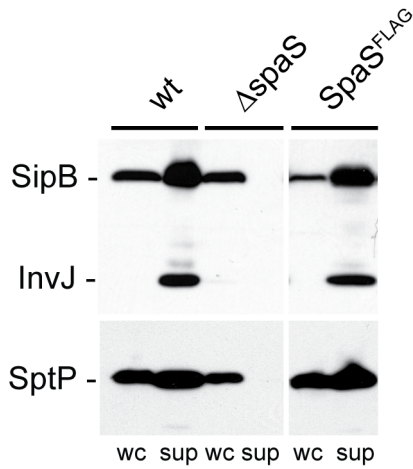

4

5

6 **Figure S3: C-terminally FLAG-tagged SpaS functions indistinguishable from wt**

7 **SpaS.** Expression levels and type III secretion into culture supernatants by indicated *S.*

8 *Typhimurium* strains was profiled by SDS-PAGE, Western blotting and

9 immunodetection of InvJ (early substrate), SipB (intermediate substrate), and SptP (late

10 substrate). Abbreviations: wc: whole cells; sup: culture supernatant.
