# Supplementary material for: Role of Autocleavage in the Function of a Type III Secretion Specificity Switch Protein in Salmonella enterica Serovar Typhimurium
Source: PubMed Central journal article supplement — mBio. 2015 Oct 13;6(5):e01459-15. doi: 10.1128/mBio.01459-15 (PMC4620466; doi:10.1128/mbio.01459-15), 2015-10-13
Supplement: mbo005152512st1.pdf [file mbo005152512st1.pdf]

1 **Table S1 to Monjarás Feria J.V. et al. “Role of autocleavage in the function of a type**  
2 **III secretion specificity switch protein in *Salmonella* Typhimurium”**

3

4 **Table S1: Strains and plasmids**

| <i>Salmonella</i> | Description                                                                                      | Reference  |
|-------------------|--------------------------------------------------------------------------------------------------|------------|
| SB762             | wild type (SL1344, <i>flhD</i> ::tet)                                                            | (1)        |
| SB2340            | <i>P<sub>ara</sub>hilA</i> , SpaS-FLAG, <i>flhD</i> ::tet                                        | this study |
| MIB3125           | <i>P<sub>ara</sub>hilA</i> , SpaS-FLAG, $\Delta$ <i>prgHIJK</i> , <i>flhD</i> ::tet              | this study |
| MIB3073           | <i>P<sub>ara</sub>hilA</i> , SpaS-FLAG, $\Delta$ <i>invA</i> , <i>flhD</i> ::tet                 | this study |
| SB2552            | <i>P<sub>ara</sub>hilA</i> , SpaS-FLAG, $\Delta$ <i>invJ</i> , <i>flhD</i> ::tet                 | this study |
| SB2537            | <i>P<sub>ara</sub>hilA</i> , SpaS-FLAG, $\Delta$ <i>prgIJ</i> , <i>flhD</i> ::tet                | this study |
| SB2553            | <i>P<sub>ara</sub>hilA</i> , SpaS <sub>N258A</sub> -FLAG, <i>flhD</i> ::tet                      | this study |
| MIB3140           | <i>P<sub>ara</sub>hilA</i> , SpaS <sub>P259A</sub> -FLAG, <i>flhD</i> ::tet                      | this study |
| MIB3291           | <i>P<sub>ara</sub>hilA</i> , SpaS <sub>T260A</sub> -FLAG, <i>flhD</i> ::tet                      | this study |
| MIB3292           | <i>P<sub>ara</sub>hilA</i> , SpaS <sub>H261A</sub> -FLAG, <i>flhD</i> ::tet                      | this study |
| SB2168            | <i>P<sub>ara</sub>hilA</i> , $\Delta$ <i>spaS</i> , <i>flhD</i> ::tet                            | this study |
| SB2326            | $\Delta$ <i>invJ</i> , <i>flhD</i> ::tet                                                         | this study |
| SB2567            | <i>P<sub>ara</sub>hilA</i> , SpaS <sub>NPTH::PreScissionSite</sub> -FLAG, <i>flhD</i> ::tet      | this study |
| MIB3133           | <i>P<sub>ara</sub>hilA</i> , SpaS <sub>N258A::E271PreScissionSite</sub> -FLAG, <i>flhD</i> ::tet | this study |
| SB1910            | SpaS-FLAG, <i>flhD</i> ::tet                                                                     | this study |
| SB1769            | SpaS <sub>N258A</sub> -FLAG, <i>flhD</i> ::tet                                                   | (2)        |
| SB2011            | SpaS <sub>N258A</sub> -FLAG, $\Delta$ <i>invA</i> , <i>flhD</i> ::tet                            | (2)        |
|                   |                                                                                                  |            |
| Plasmid           | Description                                                                                      | Reference  |
| pMIB5271          | pT10, SpaS-FLAG                                                                                  | this study |
| pSB3292           | pBAD24, HilA                                                                                     | (3)        |
| pSB4615           | pT10, <i>InvJ</i> <sub>1-15</sub> -PreScission-FLAG                                              | this study |

5

6 **References**

7 1. **Kaniga K, Tucker S, Trollinger D, Galan JE.** 1995. Homologs of the Shigella

8 IpaB and IpaC invasins are required for *Salmonella typhimurium* entry into cultured  
9 epithelial cells. J Bacteriol **177**:3965–3971.

10 2. **Wagner S, Königsmaier L, Lara-Tejero M, Lefebvre M, Marlovits TC, Galán JE.**

11 2010. Organization and coordinated assembly of the type III secretion export

- 12 apparatus. Proc Natl Acad Sci USA **107**:17745–17750.
- 13 3. **Lara-Tejero M, Kato J, Wagner S, Liu X, Galán JE.** 2011. A sorting platform  
14 determines the order of protein secretion in bacterial type III systems. Science  
15 **331**:1188–1191.
