# Supplementary material for: Role of Autocleavage in the Function of a Type III Secretion Specificity Switch Protein in Salmonella enterica Serovar Typhimurium
Source: PubMed Central journal article supplement — mBio. 2015 Oct 13;6(5):e01459-15. doi: 10.1128/mBio.01459-15 (PMC4620466; doi:10.1128/mbio.01459-15), 2015-10-13
Supplement: mbo005152512st2.pdf [file mbo005152512st2.pdf]

1 **Table S2 to Monjarás Feria J.V. et al. “Role of autocleavage in the function of a**  
2 **type III secretion specificity switch protein in *Salmonella* Typhimurium”**

3

4 **Table S2: Oligonucleotides**

| Oligonucleotide  | Sequence 5'- 3'                                                            |
|------------------|----------------------------------------------------------------------------|
| SpaS_N258A_QC_f  | CACGCCTGATTGTTGCCGCGCCCACGCATATTA CGATCG                                   |
| SpaS_N258A_QC_r  | CGATCGTAATATGCGTGGGCGCGGCAACAATCAGGCGTG                                    |
| SpaS_P259A_QC_f  | CGCCTGATTGTTGCCAACGCGACGCATATTACGATCGGG                                    |
| SpaS_P259A_QC_r  | CCCGATCGTAATATGCGTCGCGTTGGCAACAATCAGGCG                                    |
| SpaS_T260A_QC_f  | GATTGTTGCCAACCCCGCGCATATTACGATCGGGATTTATTTTAA<br>AC                        |
| SpaS_T260A_QC_r  | GTTTAAAATAAATCCCGATCGTAATATGCGCGGGGTTGGCAACA<br>ATC                        |
| SpaS_H261A_QC_f  | GTTGCCAACCCACGCGGATTACGATCGGGATTTATTTTAAACCC                               |
| SpaS_H261A_QC_r  | GGGTTTAAAATAAATCCCGATCGTAATCGCCGTGGGGTTGGCAA<br>C                          |
| SpaS_NPThPreSc_f | CTCACGCCTGATTGTTGCCCTGGAAGTGTTATTTTCAGGGTCCGAT<br>TACGATCGGGATTTATTTTAAACC |
| SpaS_NPThPreSc_r | GGTTTAAAATAAATCCCGATCGTAATCGGACCCTGAAATAAC<br>ACTTCCAGGGCAACAATCAGGCGTGAG  |
| SpaS_E271PreSc_f | CGGGATTTATTTTAAACCCGAACTGGAAGTGTTATTTTCAGGGTCC<br>GTTGATGCCGATTCCGATG      |
| SpaS_E271PreSc_r | CATCGGAATCGGCATCAACGGACCCTGAAATAAACACTTCCAGTT<br>CGGGTTAAAATAAATCCCG       |

5
